# Supplementary material for: No Object–Location Memory Improvement through Focal Transcranial Direct Current Stimulation over the Right Temporoparietal Cortex
Source: MDPI journal article supplement (doi:10.3390/life14050539), 2024-04-23
Supplement: s1 [file s1]

**Supplementary Table S1.** Descriptive values from the object-location memory training

|       |          | Group  | Number of cases | Mean [%] | 95%-CI |      |
|-------|----------|--------|-----------------|----------|--------|------|
| Day 1 | Recall 1 | anodal | 26              | 11.1     | 7.5    | 14.6 |
|       |          | sham   | 26              | 15.2     | 11.4   | 19.0 |
|       | Recall 2 | anodal | 26              | 27.9     | 22.1   | 33.7 |
|       |          | sham   | 26              | 35.3     | 28.1   | 42.4 |
|       | Recall 3 | anodal | 26              | 44.8     | 37.0   | 52.7 |
|       |          | sham   | 26              | 54.0     | 44.5   | 63.6 |
| Day 2 | Recall 4 | anodal | 26              | 40.8     | 33.4   | 48.1 |
|       |          | sham   | 26              | 50.2     | 40.4   | 60.0 |
|       | Recall 5 | anodal | 26              | 55.9     | 47.2   | 64.6 |
|       |          | sham   | 26              | 66.9     | 57.2   | 76.6 |
|       | Recall 6 | anodal | 26              | 67.6     | 59.5   | 75.7 |
|       |          | sham   | 26              | 76.8     | 66.8   | 86.9 |

*Note.* CI. Confidence Interval. Mean displays number of correct responses during each recall trial in percent.

**Supplementary Table S2.** Linear mixed model

|                           | Estimate | 2.5 % CI | 97.5 % CI | p-value |
|---------------------------|----------|----------|-----------|---------|
| (Intercept)               | 0.05     | -0.44    | 0.54      | 0.85    |
| Group (anodal)            | -0.04    | -0.14    | 0.06      | 0.44    |
| Recall                    | 0.19     | 0.17     | 0.22      | < 0.001 |
| Day                       | 0.36     | 0.32     | 0.40      | < 0.001 |
| Baseline                  | 0.29     | 0.02     | 0.55      | 0.05    |
| Age                       | 0.00     | -0.02    | 0.02      | 0.97    |
| Sex (female)              | 0.04     | -0.07    | 0.15      | 0.50    |
| Strategy (Position)       | -0.10    | -0.21    | 0.00      | 0.07    |
| Group (anodal):Recall     | -0.03    | -0.06    | 0.01      | 0.14    |
| Group (anodal):Day        | -0.06    | -0.12    | 0.01      | 0.08    |
| Recall:day                | -0.06    | -0.09    | -0.03     | 0.00    |
| Group (anodal):Recall:Day | 0.03     | -0.02    | 0.07      | 0.28    |

*Note.* CI. Confidence interval. Linear mixed model for analyzing primary outcome, random intercept for participant. Performance ~ Group \* Recall \* Day + Baseline + Age + Sex + Strategy + (1 | ID). Number of observations: 312, groups: ID, 52
